# Supplementary material for: Low turn-on voltage and low roll-off rare earth europium complex-based organic light-emitting diodes with exciplex as the host
Source: Royal Society of Chemistry journal article supplement (doi:10.1039/c7tc03694a), 2017-01-01
Supplement: c7tc03694a1.pdf [file c7tc03694a1.pdf]

## Supporting Information

### **Low turn-on voltage and low roll-off rare earth europium-complex based organic light-emitting diodes with exciplex as the host**

Bo Zhao,<sup>a,b\*</sup> Heng Zhang,<sup>a,b</sup> Yanqin Miao,<sup>a,b</sup> Ziqi Wang,<sup>a,b</sup> Long Gao,<sup>a,b</sup> Hua Wang,<sup>a,b</sup> Yuying Hao,<sup>c</sup> Bingshe Xu,<sup>a,b</sup> and Wenlian Li<sup>d</sup>

<sup>a</sup>Key Laboratory of Interface Science and Engineering in Advanced Materials, Ministry of Education, Taiyuan University of Technology, Taiyuan 030024, PR China

<sup>b</sup>Research Center of Advanced Materials Science and Technology, Taiyuan University of Technology, Taiyuan 030024, PR China

<sup>c</sup>Key Laboratory of Advanced Transducers and Intelligent Control System of Ministry of Education, College of Physics and Optoelectronics, Taiyuan University of Technology, Taiyuan 030024, PR China

<sup>d</sup>State Key Laboratory of Luminescence and Applications, Changchun Institute of Optics, Fine Mechanics, and Physics, Chinese Academy of Sciences, Changchun 130033, PR China

\*Corresponding author:

E-mail: zhaobo01@tyut.edu.cn

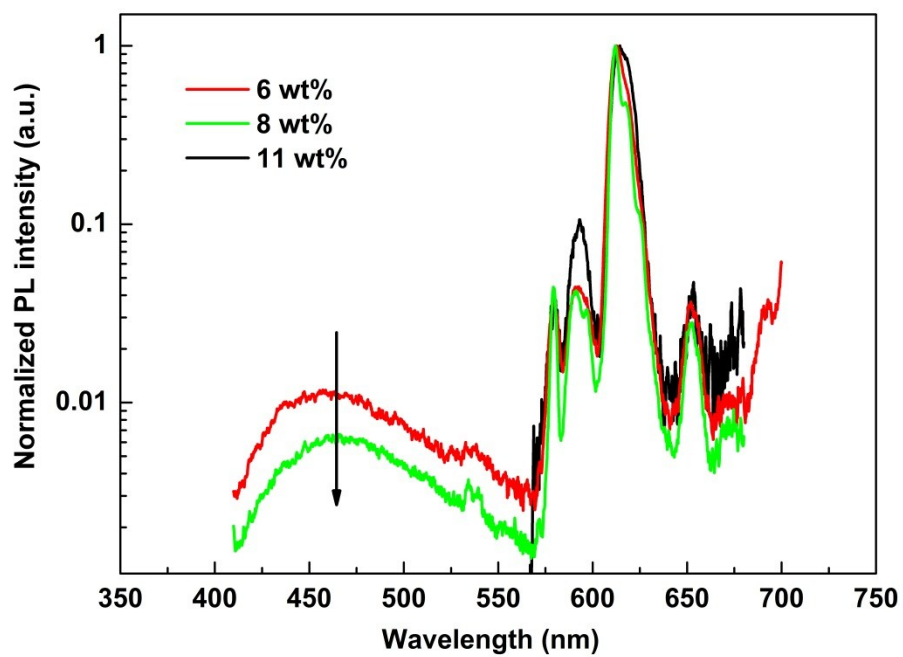

Figure S1. The PL spectra of films with different concentrations Eu(DBM)<sub>3</sub>Phen doped into TCTA: Bphen. The direction of arrow represents the doping concentration rise.

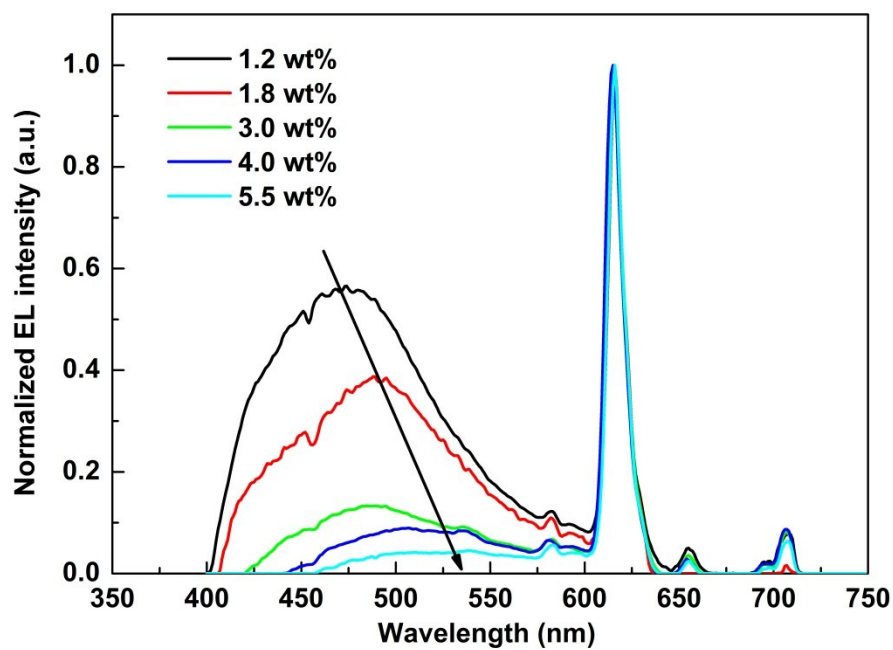

Figure S2. The EL spectra of OLEDs with different concentrations  $\text{Eu}(\text{DBM})_3\text{Phen}$  doped into TCTA: Bphen host. The direction of arrow represents the doping concentration rise.

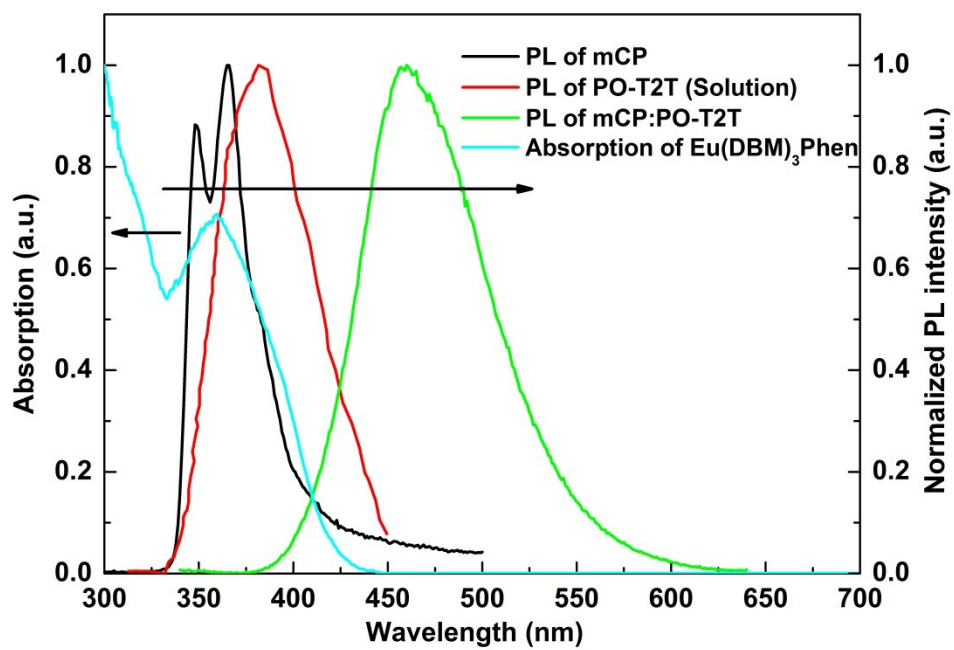

Figure S3. The PL spectra of mCP and mCP: PO-T2T (1:1) films, PO-T2T solution and absorption spectrum of Eu(DBM)<sub>3</sub>Phen film.
